# Supplementary material for: Humidity-dependent piezoelectric output of Al–ZnO nanowire nanogenerator and its applications as a self-powered active humidity sensor
Source: Royal Society of Chemistry journal article supplement (doi:10.1039/c4ra10216a), 2014-10-23
Supplement: c4ra10216a1.pdf [file c4ra10216a1.pdf]

## Humidity-dependent piezoelectric output of Al-ZnO nanowire nanogenerator and its applications as self-powered active humidity sensor

Weili Zang,<sup>a</sup> Wei Wang,<sup>a</sup> Dan Zhu,<sup>a</sup> Lili Xing<sup>\*a</sup> and Xinyu Xue<sup>\*a</sup>

<sup>a</sup> College of Sciences, Northeastern University, Shenyang, 110004, China

E-mail: xinglili@mail.neu.edu.cn; xuexinyu@mail.neu.edu.cn.

### Supplementary Information

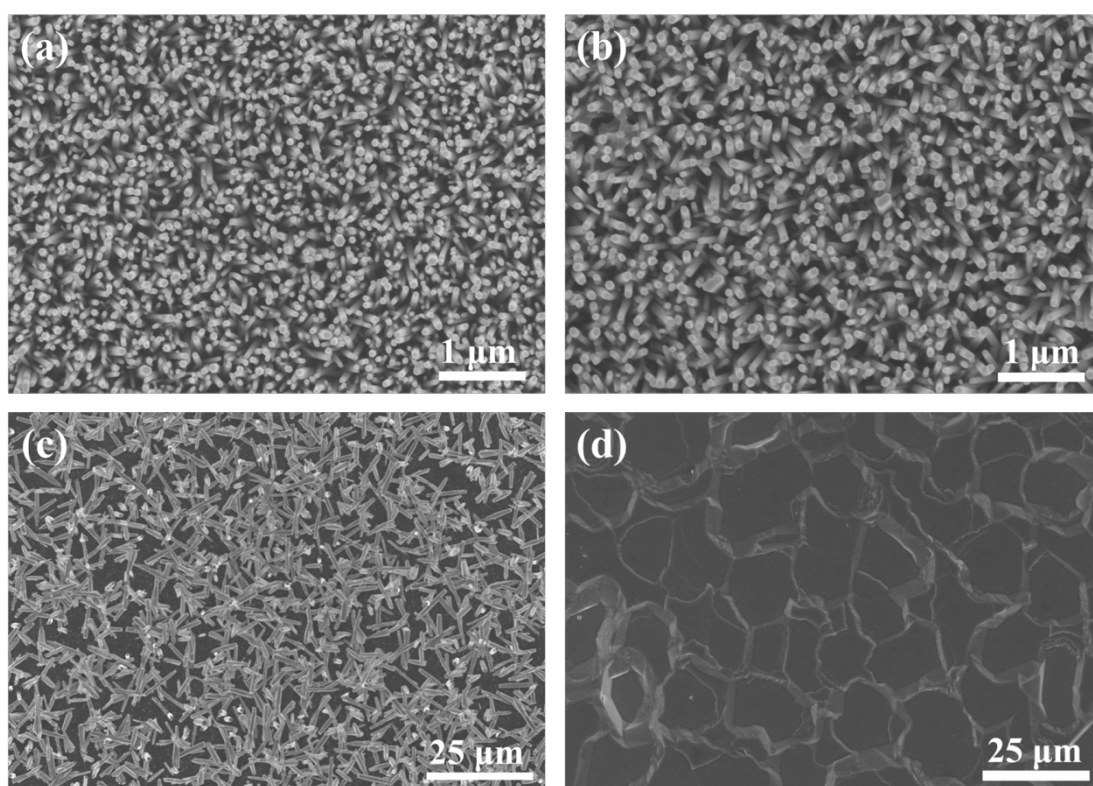

**Fig. S1** SEM image shows that the diameter of nanowires increases with the Al-doping concentration increases. The concentrations of Al in the growth solution are referred as Al/Zn molar ratios, and are 0 (a), 0.5% (b), 3.0% (c), and 5.0% (d), respectively.
